# Supplementary material for: Service Process Factors Affecting Patients’ and Clinicians’ Experiences on Rapid Teleconsultation Implementation in Out-patient Neurology Services during COVID-19 Pandemic: A Scoping Review
Source: Research Square preprint supplement (doi:10.21203/rs.3.rs-1125499/v1), 2021-12-09
Supplement: Supplementary file 2 [file 42948ba93705198c6cebfc2d.docx]

**Additional file 4** The SERVQUAL questionnaire of a telehealth program in the case hospital conducted by Yin et al. (2016)

| Dimension | Questions |
| --- | --- |
| Tangible | 1. The hospital has easy to operate equipment  2. The hospital provides teaching lessons for equipment operations  3. Physiological measurement equipment provided by the hospital is functioning normally |
| Reliability | 4. Hospital staff has completed the promised duties in time  5. Hospital staff is concerned my problem and resolves my problem  6. Equipment services provided by the hospital are trustworthy and reliable  7. Hospital staff can reply my needs and recommendations in time  8. The hospital can keep my measurement data each time and provide my historical data for query |
| Responsiveness | 9. Hospital staff contacts me directly to make an arrangement for further examination when abnormal physiological measurement data are found  10. My questions have been quickly responded  11. Hospital staff is willing to understand and solve my problems  12. Hospital staff provides the timely services for me |
| Assurance | 13. I feel warm and ease when hospital staff provides services  14. I feel comfortable and trust during the interaction with hospital staff  15. Hospital staff provides services friendly and courteously  16. Services provided by hospital staff are complete and meet my needs |
| Empathy | 17. The hospital can provide customized needs for individuals  18. Hospital staff has sufficient medical knowledge and technology  19. Hospital staff respects opinions and cares needs for individuals  20. The hospital places a high priority for my interests  21. The operation hours provided by the hospital meet my needs |
