# Supplementary material for: Service Process Factors Affecting Patients’ and Clinicians’ Experiences on Rapid Teleconsultation Implementation in Out-patient Neurology Services during COVID-19 Pandemic: A Scoping Review
Source: Research Square preprint supplement (doi:10.21203/rs.3.rs-1125499/v1), 2021-12-09
Supplement: Supplementary file 5 [file e058adcc027866738d9f2921.docx]

**Additional file 6**

The most frequent SERVQUAL dimensions, process factors, sub-themes with selected quotes (N=300)

| Dimension | Most frequent process factors | Sub-themes | Selected quotes |
| --- | --- | --- | --- |
| Assurance  (n=113)  (The knowledge and courtesy of employees and their ability to inspire trust and confidence) | Clinical activities (n=69):  PE (n=32) | The positive role of video in PE    Limitation of remote PE;  Lacking utilization of remote assessment tools;  Availability of family support | Better interaction between clinicians and patients, and the use of video to enable a degree of examination led to an improved experience (6_PR~~b~~_59).  52% of providers disagreed that they were able to do the relevant neurological examination virtually (14_PR_310).  A significant implementation barrier was the limited nature of the remote neurologic examination (11_PR_371).  A majority of the responders (83.3%) reported not having administered any questionnaires (quality of life, adverse effects, depression, etc.) over the phone or by videoconference. (5_PR_271)  Occasionally required assistance from a caregiver to position the phone to properly observe the patient, perform certain physician-directed exams (16_PR_164) |
| Confidence in care  (n=23) | Video adding confidence;  Experiences and training adding confidence;  Perceptions of decreased standard care.  Unusual conditions (delivery bad news or sensitive information) lowing the confidence. | Compared with telephone (audio only), the use of videoconferencing technology was associated with increased confidence in the ability of telemedicine to formulate and communicate a treatment plan when compared to in-person visits (12_PR_296).  Those with neurosurgery training described increased confidence in telemedicine for imaging review and explanation (12_PR_301).  …the corresponding proportion that reported an overall reduced standard of care during the pandemic were, respectively, 9% and 30% in epilepsy, 3% and 42% in headache, 24% and 71% in multiple sclerosis, and 57% and 74% in movement disorders. (10_PR_253). |
| Communication  (n=17) | Perceived risk of misunderstanding.  Difficult recognizing emotion;  Difficult establishing trust relationship  Superiority of video visits in communication (enhance PE and diagnosis). | …only 62.5% felt the patient had understood the information correctly. (5_PR_270)  The difficulties recognizing when patients are upset(1_PR_3)  Clinicians reported that video visits were superior to a phone call, allowing them to gather more information than just a medical history. (16_PR_158). |
| Reliability  (n=96)  (the ability to perform the promised service dependably and accurately) | Appropriate triage  (n=55) | Clinical factors:   - Follow-up vs New - Screening or stratification - Disease characteristics   (severity, stability, acuity, complexity)  Patient factors:   - Demographic; - Physical or psychological   limitation; - Caregiver support; - Access to technology; - Experience in using technology. | When asked what type of visit telehealth was most suited for, 62% of providers chose follow-up visits (14_PR_317).  Would want to conduct a traditional appointment if the patient had new or worsening symptoms. (3_PR_91).  Numerous clinicians mentioned that some patients, particularly older adults and lower-income patient populations (e.g., unhoused individuals or rural farm workers), lacked technological capability to support a video call. (16_PR_154)  In the absence of a supportive family member/caregiver, video visits with patients with cognitive, hearing, or visual impairment were also considered nonideal. (16_PR_155) |
| Administrative support (n=19) | Change work flow: Scheduling and registration;  Previsit preparation technically and medically;  Accurate patient information. | …administrative challenges in registration and scheduling (11_PR_346).  Patients were often unprepared (6_PR_37)  Lack of previsit charting and medication reconciliation (16_PR_134). |
| Tangible  (n=61)  (The equipment and personnel) | Technical issues  (n=44) | System availability;  System reliability;  System connectivity;  System flexibility;  Functionality limitation. | Barriers noted included access to technology, (16_PR_138)  …challenges in adapting platforms to meet the needs of patients and clinicians (11_PR_345) |
| Responsiveness  (n=23)  (The willingness to help customers and provide prompt service) | Address patients’ logistical needs (n= 13) | Convenience (save time, travel and decrease cost) | Providers felt that televisits would reduce burden on patients related to transportation, behavior, and physical limitations. (3_PR_92)  … increased convenience for patients, less cost for patients…(15_PR_229) |
| Empathy (n=7)  (The provision of individual care and attention to customers) | Human touch  (n=6) | Losing/missing relationship  Lacking empathy: business-like | 38% of clinician Missing/losing (the in-person connection/) relationship with patients (16_PR_115).  …sense of empathy that is challenging to achieve remotely (15_PR_219).  The perception that telephone consultations were of a different style, more ‘business-like’. (6_PR_22) |
